# Supplementary material for: Novel synthesis of positively charged N,S-doped carbon dots as an efficient fluorescent probe for l -aspartic acid sensing
Source: Royal Society of Chemistry journal article supplement (doi:10.1039/d5na00747j), 2025-11-18
Supplement: d5na00747j1.pdf [file d5na00747j1.pdf]

Supporting information

# Novel synthesis of positively charged N,S-doped carbon dots as efficient fluorescent probe for L-aspartic acid sensing

Ananya Dutta,<sup>a</sup> Dinesh Kumar Shukla,<sup>b</sup> Sonit Kumar Gogoi<sup>a</sup> \*

<sup>a</sup> Department of Chemistry, Gauhati University, G. B. Nagar, Guwahati, 781014, Assam, India

<sup>b</sup> UGC-DAE Consortium for Scientific Research, Indore, 452001, India

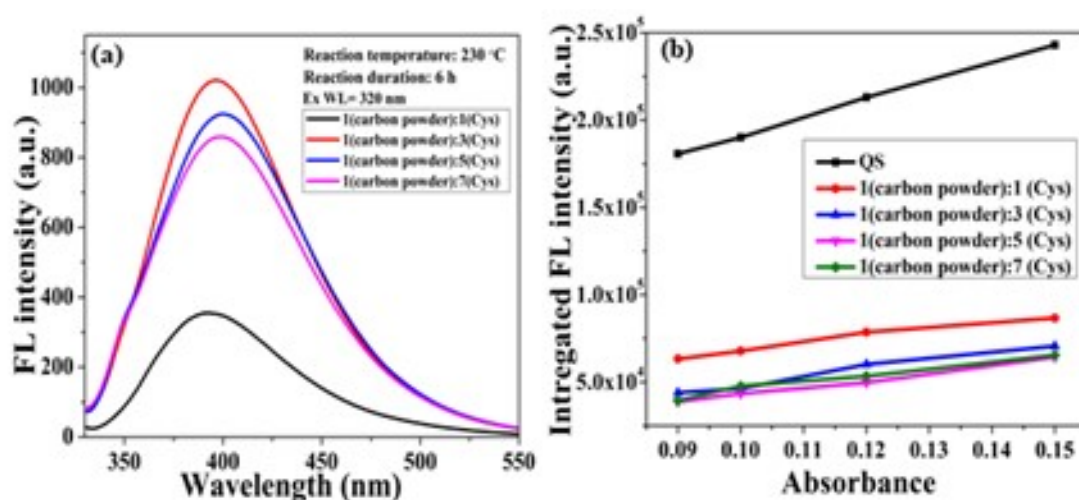

**Figure S1** (a) Combined FL emission spectra at 320 nm of excitation wavelength and (b) FLQY plots for the N,S-CDs synthesized at different stoichiometric ratios of the precursors at 230 °C for 6 h of reaction duration.

**Table S1:** FLQY of CDs obtained by the reaction of different stoichiometric ratios of precursors with QS as reference.

| Sample                  | Gradient | $\Phi_x$ (%) | $R^2$ |
|-------------------------|----------|--------------|-------|
| Quinine sulphate        | 1000000  |              | 0.99  |
| 1(carbon powder):1(Cys) | 394132   | 21.28%       | 0.97  |
| 1(carbon powder):3(Cys) | 465579   | 25.14%       | 0.97  |
| 1(carbon powder):5(Cys) | 418295   | 22.58%       | 0.99  |
| 1(carbon powder):7(Cys) | 405944   | 21.92%       | 0.98  |

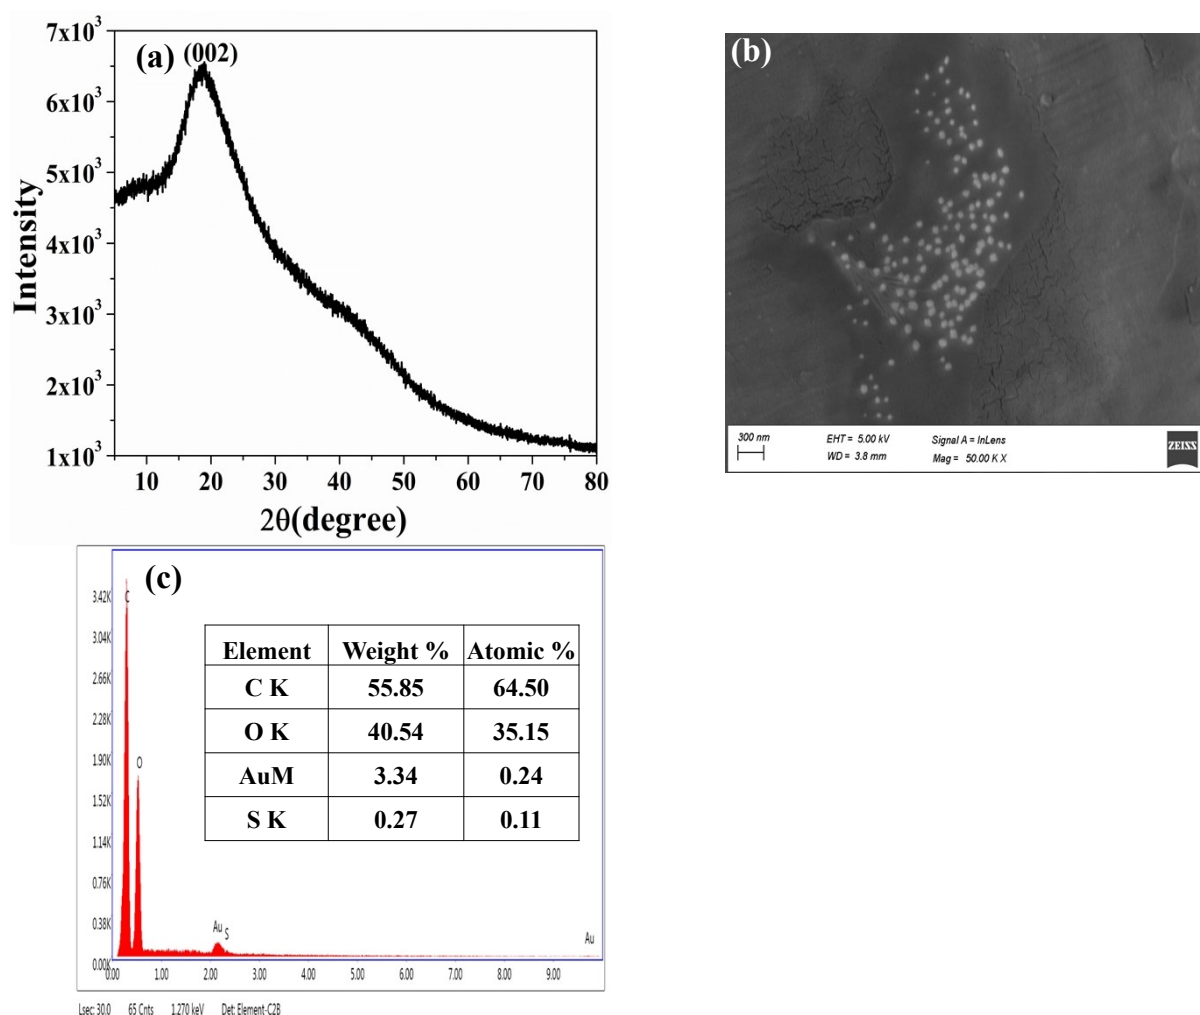

**Figure S2** (a) PXRD pattern (b) FESEM image and (c) EDX spectrum for carbon powder respectively.

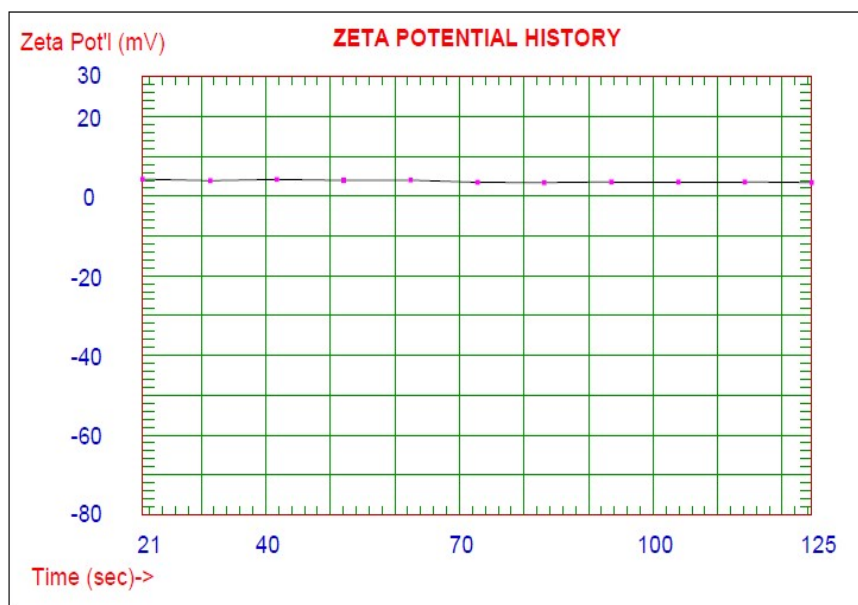

**Figure S3:** Zeta potential analysis of N,S-CDs

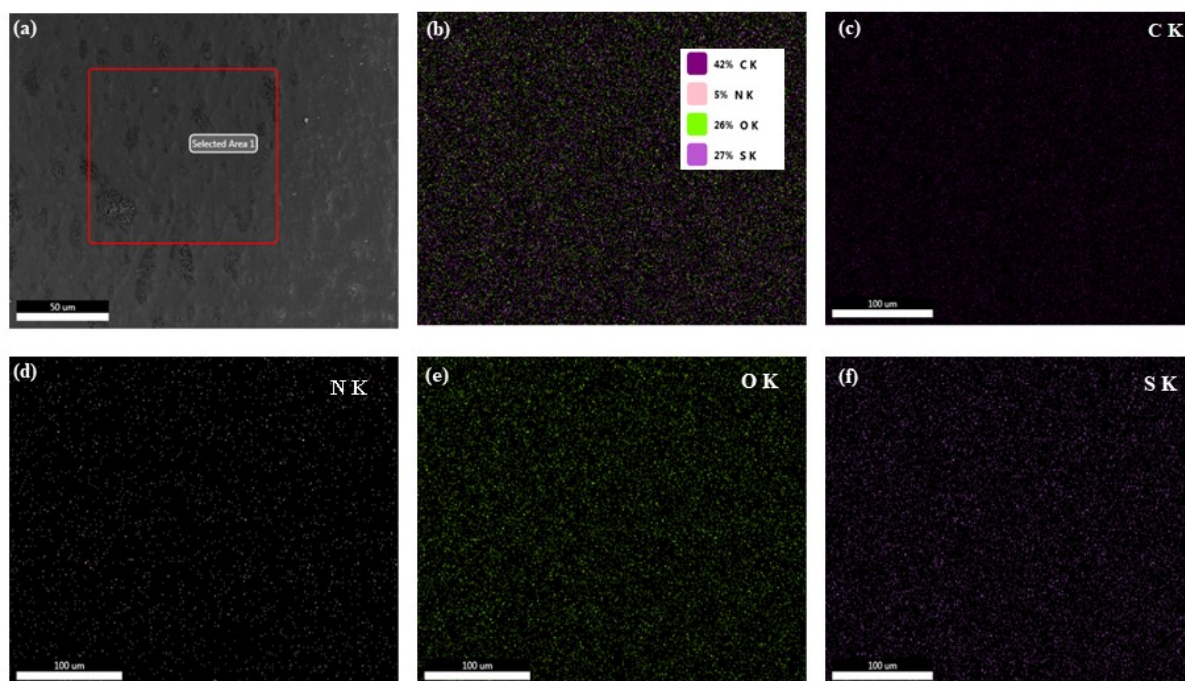

**Figure S4:** (a) FESEM image of the region of N,S-CDs chosen for elemental mapping (b) overall mapping and mapping for (c)carbon (d)nitrogen (e)oxygen and (f) sulfur respectively.

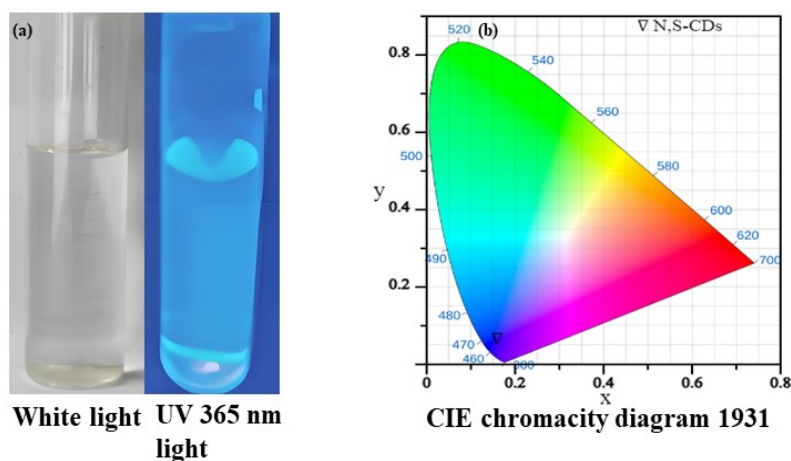

**Figure S5:** (a) Photographic image under white light and UV 365 nm light and (b) CIE chromacity diagram 1931 for N,S-CDs respectively.

The dilute aqueous solution of N,S-CDs is colorless when viewed under white light and blue when observed under UV light of wavelength 365 nm.

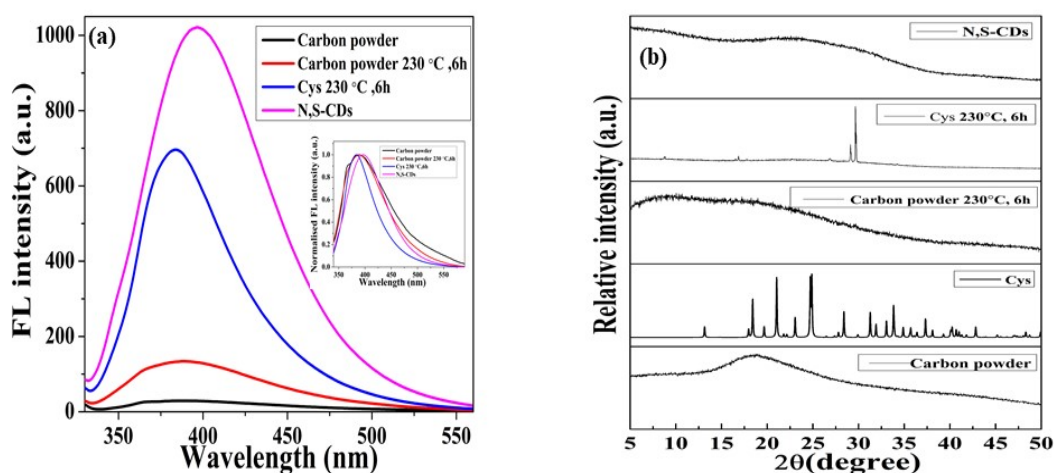

**Figure S6:** (a) FL emission spectra for carbon powder; carbon powder 230 °C, 6h; Cys 230 °C, 6 h and N,S-CDs at 320 nm of excitation wavelength (inset: the corresponding normalized FL spectra showing the shift in emission center) and (b) PXRD pattern for carbon powder; Cys (simulated), carbon powder 230 °C, 6h; Cys 230 °C, 6 h and N,S-CDs respectively.

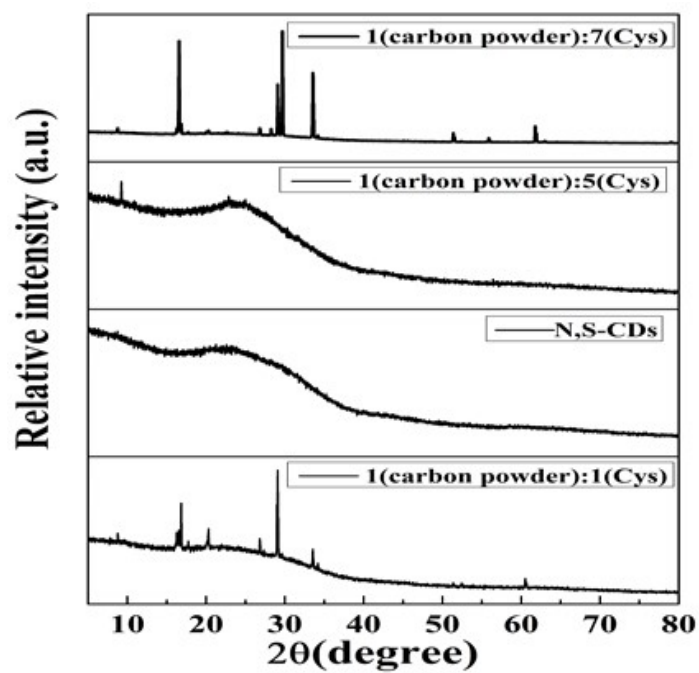

**Figure S7:** PXRD pattern of the products obtained through hydrothermal treatment of carbon powder and Cys at different stoichiometric ratios for 6 h at 230 °C.

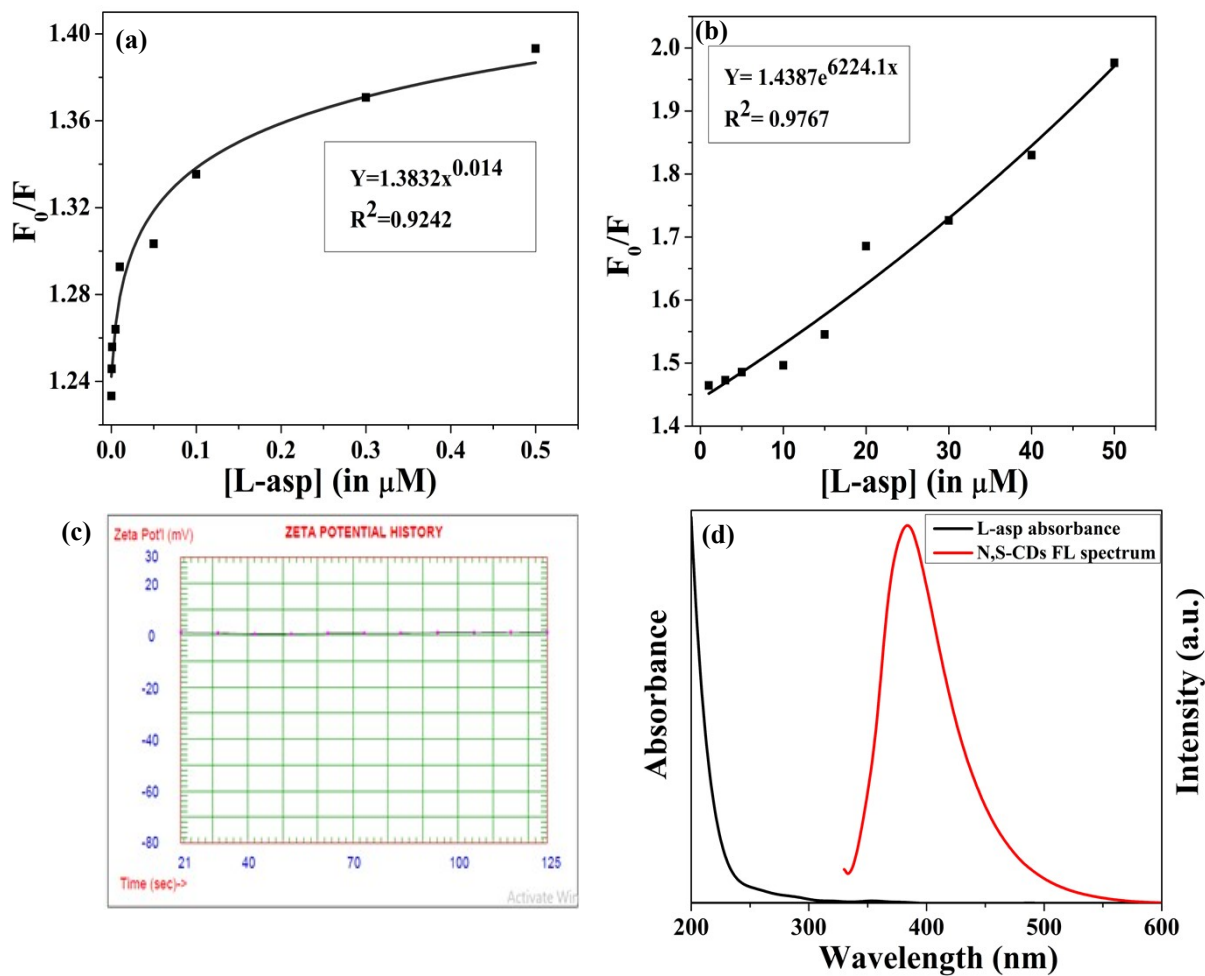

**Figure S8:**  $F_0/F$  vs [L-asp] plot for L-asp concentration range of (a) 0.0001  $\mu\text{M}$  to 0.5  $\mu\text{M}$  and (b) 1  $\mu\text{M}$  to 50  $\mu\text{M}$  (c) Zeta potential of N,S-CDs-L-asp system (d) UV -visible absorbance spectrum of L-asp and FL emission spectrum of N,S-CDs respectively.

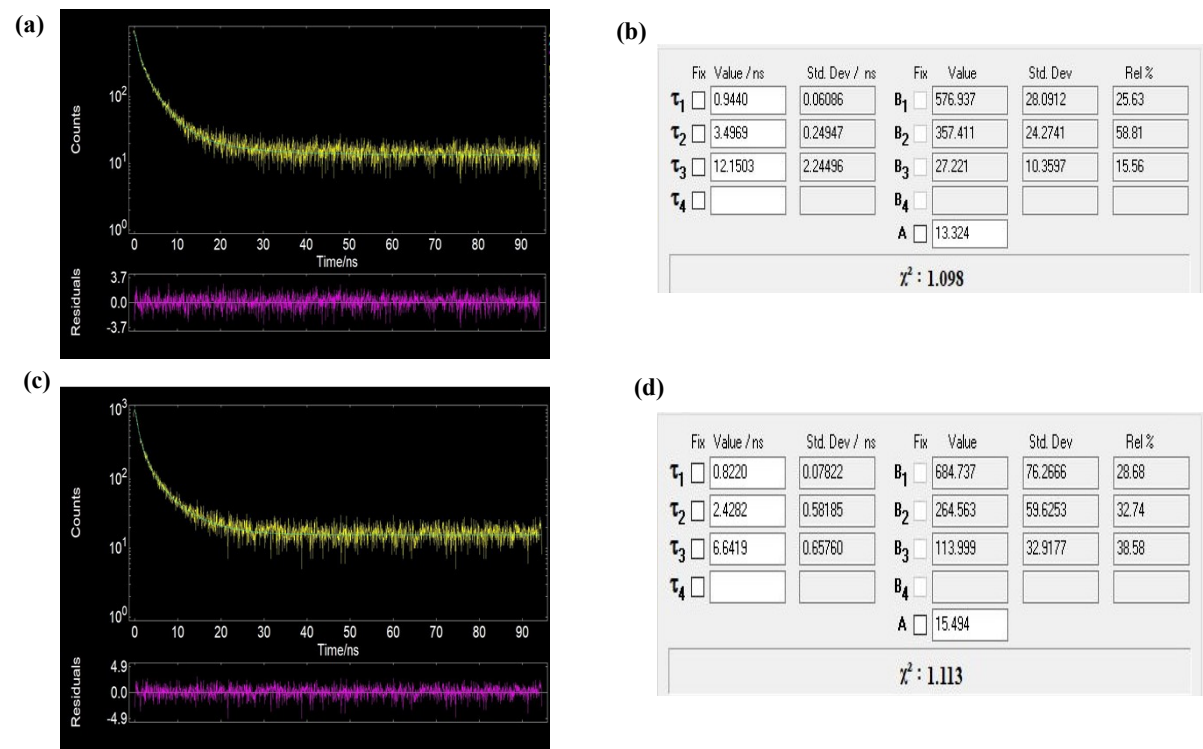

**Figure S9:** FL lifetime fitting graphs for (a) N,S-CDs and (c) N,S-CDs-L-asp system and the corresponding fitting parameters for (b) N,S-CDs and (d) N,S-CDs-L-asp respectively.
